# Supplementary material for: Quantification of the variation in percentage identity for protein sequence alignments
Source: Springer Nature journal article supplement (doi:10.1186/1471-2105-7-415), 2006-09-19

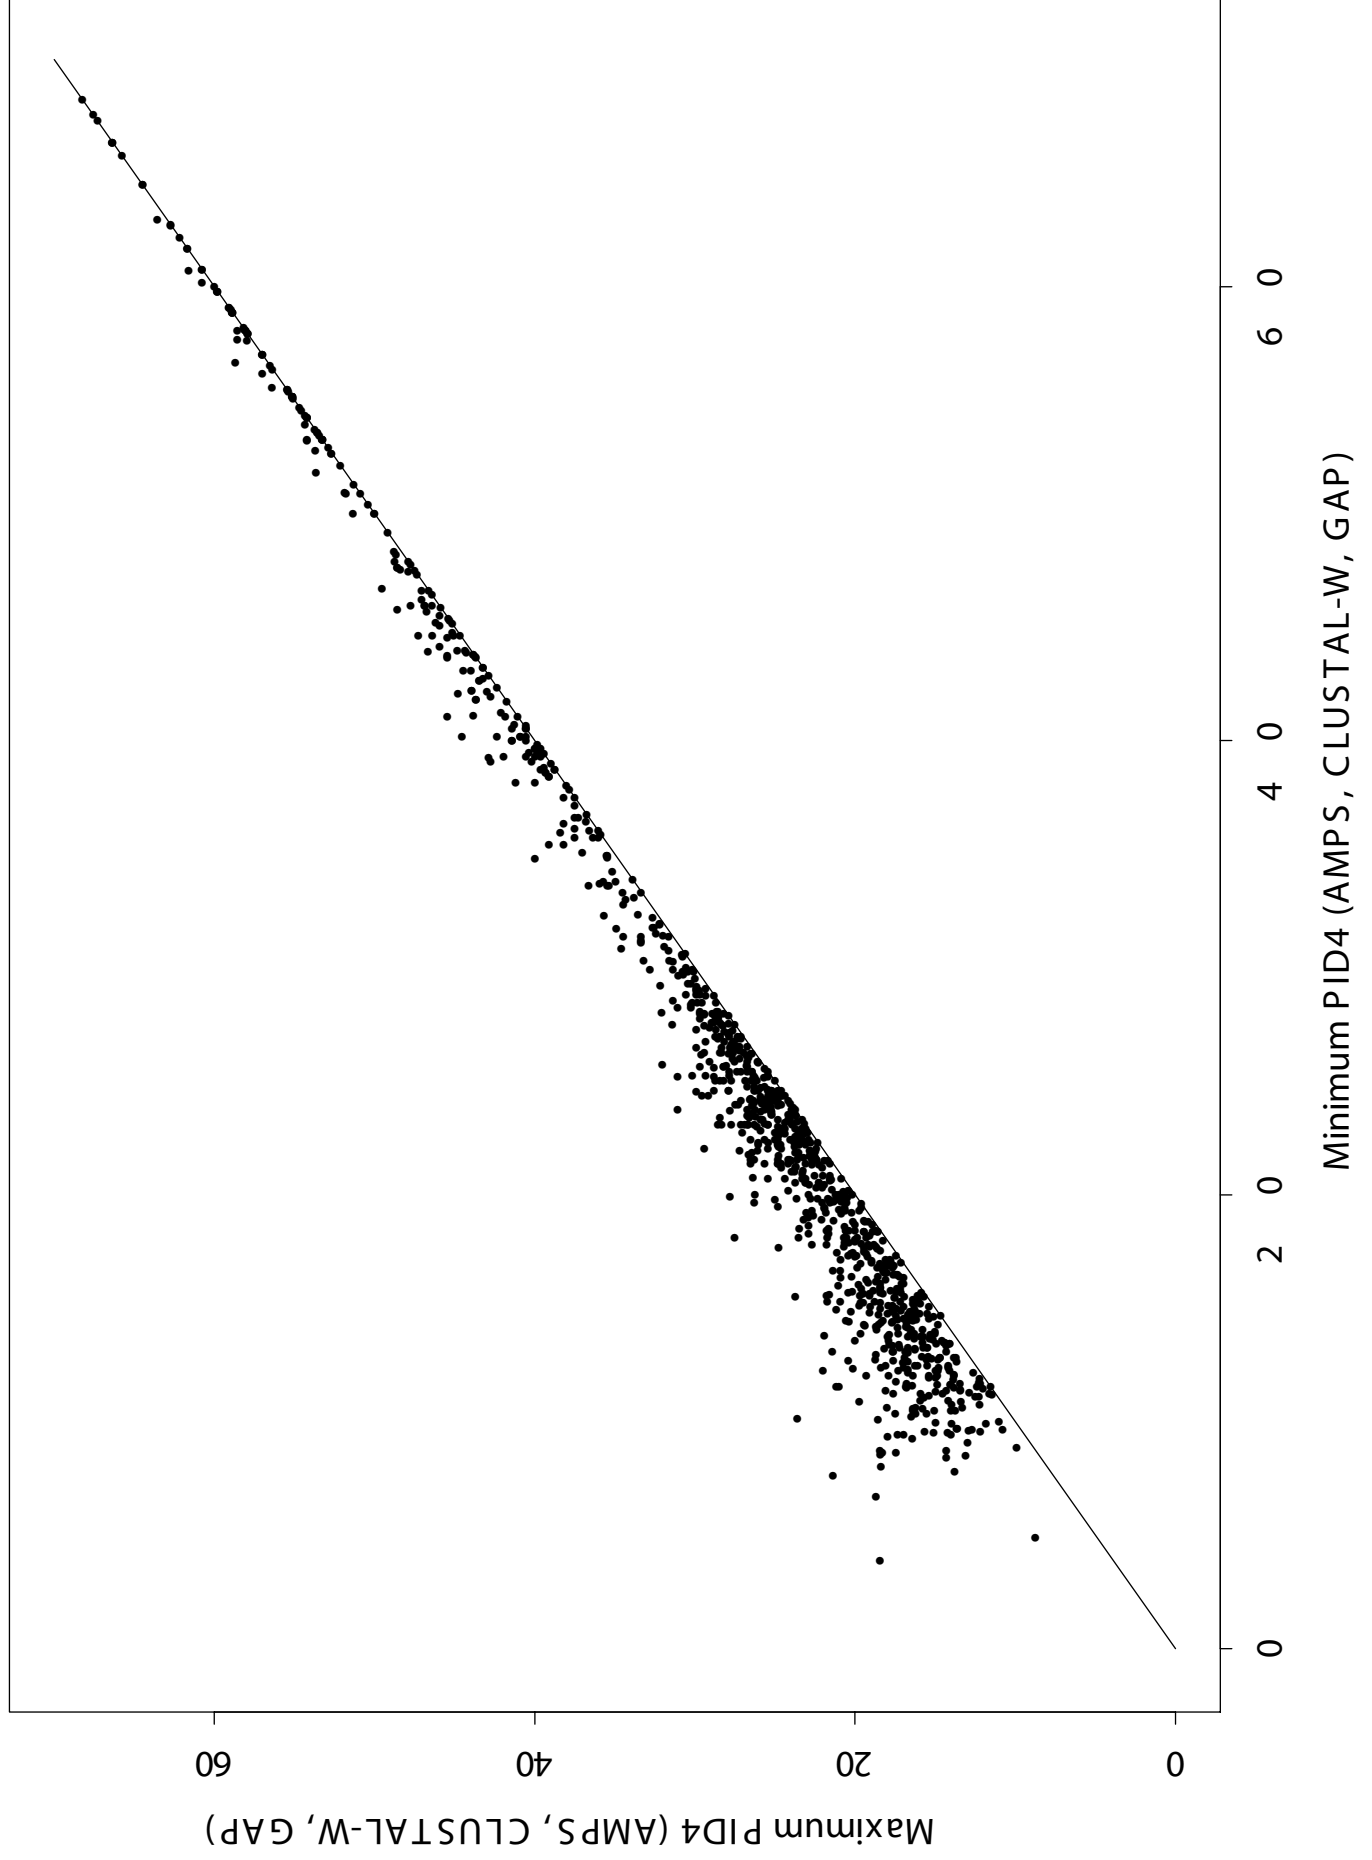

Supplement: 12859_2005_1154_MOESM3_ESM.pdf [file 12859_2005_1154_MOESM3_ESM.pdf]
